# Supplementary material
Source: PubMed Central journal article supplement (PMC3864724)
Supplement: supp_mct253_mct253supp.pdf [file supp_mct253_mct253supp.pdf]

## SUPPLEMENTARY DATA

Table S1. Characteristics of haplotypes detected with four chloroplast microsatellites in *Eucalyptus gomphocephala*.

| Haplotype | Individuals | Allele size per primer locus (in bp) |           |           |           |
|-----------|-------------|--------------------------------------|-----------|-----------|-----------|
|           |             | EMCRC59cp                            | EMCRC60cp | EMCRC65cp | EMCRC67cp |
| A         | 19 (8.0 %)  | 244                                  | 199       | 246       | 241       |
| B         | 12 (5.0 %)  | 245                                  | 199       | 247       | 241       |
| C         | 40 (16.8 %) | 242                                  | 199       | 246       | 238       |
| D         | 63 (26.0 %) | 244                                  | 199       | 246       | 242       |
| E         | 10 (4.2 %)  | 244                                  | 200       | 246       | 242       |
| F         | 94 (39.5 %) | 244                                  | 199       | 245       | 242       |

Table S2. Matrix of pairwise  $F_{ST}$  values (lower diagonal) and probability values of significance based on 1000 permutations (upper diagonal) for 24 *Eucalyptus gomphocephala* populations included in this study. Numbers in bold indicate  $F_{ST}$  was significantly different from 0 at  $P < 0.005$  after pairwise Bonfferoni correction.

|     | SB    | NB           | BT           | ML           | SBR          | GD           | MRG          | YA           | NE           | BP           | PG           | WP           | TT           | S10          | WH           | QU           | DO           | PR           | LE           | MB           | LD           |
|-----|-------|--------------|--------------|--------------|--------------|--------------|--------------|--------------|--------------|--------------|--------------|--------------|--------------|--------------|--------------|--------------|--------------|--------------|--------------|--------------|--------------|
| SB  |       | <b>0.001</b> |
| NB  | 0.073 |              | <b>0.001</b> |
| BT  | 0.063 | 0.053        |              | <b>0.001</b> |
| ML  | 0.068 | 0.052        | 0.052        |              | <b>0.001</b> |
| SBR | 0.037 | 0.035        | 0.03         | 0.031        |              | 0.008        | 0.002        | 0.003        | 0.102        | 0.02         | 0.011        | <b>0.001</b> |
| GD  | 0.033 | 0.046        | 0.039        | 0.058        | 0.015        |              | 0.004        | 0.002        | <b>0.001</b> |
| MRG | 0.045 | 0.068        | 0.045        | 0.029        | 0.016        | 0.023        |              | <b>0.001</b> | 0.013        | <b>0.001</b> |
| YA  | 0.049 | 0.034        | 0.037        | 0.036        | 0.018        | 0.025        | 0.029        |              | 0.004        | 0.009        | <b>0.001</b> |
| NE  | 0.043 | 0.040        | 0.034        | 0.025        | 0.006        | 0.032        | 0.012        | 0.014        |              | 0.013        | 0.014        | <b>0.001</b> |
| BP  | 0.060 | 0.051        | 0.039        | 0.047        | 0.011        | 0.034        | 0.032        | 0.014        | 0.011        |              | 0.11         | 0.008        | <b>0.001</b> |
| PG  | 0.069 | 0.050        | 0.051        | 0.047        | 0.012        | 0.035        | 0.038        | 0.026        | 0.012        | 0.006        |              | 0.002        | <b>0.001</b> |
| WP  | 0.067 | 0.082        | 0.056        | 0.061        | 0.043        | 0.065        | 0.059        | 0.030        | 0.032        | 0.014        | 0.025        |              | <b>0.001</b> |
| TT  | 0.067 | 0.054        | 0.029        | 0.060        | 0.034        | 0.033        | 0.051        | 0.044        | 0.036        | 0.030        | 0.025        | 0.051        |              | 0.006        | 0.012        | <b>0.001</b> | <b>0.001</b> | 0.005        | <b>0.001</b> | <b>0.001</b> | <b>0.001</b> |
| S10 | 0.102 | 0.077        | 0.046        | 0.066        | 0.038        | 0.060        | 0.056        | 0.066        | 0.040        | 0.037        | 0.027        | 0.062        | 0.016        |              | 0.008        | <b>0.001</b> | <b>0.001</b> | <b>0.001</b> | <b>0.001</b> | <b>0.001</b> | <b>0.001</b> |
| WH  | 0.085 | 0.056        | 0.048        | 0.066        | 0.040        | 0.046        | 0.059        | 0.053        | 0.038        | 0.050        | 0.031        | 0.059        | 0.012        | 0.013        |              | <b>0.001</b> | <b>0.001</b> | 0.042        | <b>0.001</b> | <b>0.001</b> | <b>0.001</b> |
| QU  | 0.108 | 0.088        | 0.043        | 0.081        | 0.050        | 0.080        | 0.067        | 0.071        | 0.052        | 0.048        | 0.050        | 0.074        | 0.024        | 0.024        | 0.043        |              | <b>0.001</b> | <b>0.001</b> | <b>0.001</b> | <b>0.001</b> | <b>0.001</b> |
| DO  | 0.142 | 0.098        | 0.112        | 0.114        | 0.069        | 0.098        | 0.111        | 0.081        | 0.059        | 0.058        | 0.040        | 0.070        | 0.073        | 0.069        | 0.063        | 0.101        |              | <b>0.001</b> | <b>0.001</b> | <b>0.001</b> | <b>0.001</b> |
| PR  | 0.087 | 0.057        | 0.057        | 0.049        | 0.048        | 0.063        | 0.063        | 0.05         | 0.042        | 0.048        | 0.034        | 0.063        | 0.015        | 0.019        | 0.01         | 0.039        | 0.078        |              | <b>0.001</b> | <b>0.001</b> | 0.008        |
| LE  | 0.109 | 0.094        | 0.079        | 0.102        | 0.061        | 0.093        | 0.081        | 0.089        | 0.052        | 0.068        | 0.061        | 0.096        | 0.049        | 0.039        | 0.053        | 0.045        | 0.112        | 0.048        |              | <b>0.001</b> | <b>0.001</b> |
| MB  | 0.085 | 0.063        | 0.068        | 0.066        | 0.050        | 0.068        | 0.052        | 0.049        | 0.034        | 0.050        | 0.041        | 0.073        | 0.035        | 0.053        | 0.047        | 0.034        | 0.100        | 0.033        | 0.041        |              | <b>0.001</b> |
| LD  | 0.090 | 0.057        | 0.065        | 0.065        | 0.046        | 0.063        | 0.061        | 0.054        | 0.038        | 0.043        | 0.043        | 0.068        | 0.027        | 0.030        | 0.026        | 0.037        | 0.096        | 0.014        | 0.036        | 0.020        |              |

Table S3. Analysis of Molecular Variance.

| Source       | d.f. | SS      | MS    | Est. Var. | %   |
|--------------|------|---------|-------|-----------|-----|
| Among Pops   | 20   | 220.64  | 11.03 | 0.14      | 5   |
| Among Indiv  | 576  | 1643.91 | 2.85  | 0.17      | 6   |
| Within Indiv | 597  | 1497.50 | 2.51  | 2.51      | 89  |
| Total        | 1193 | 3362.06 |       | 2.83      | 100 |
